# Supplementary material
Source: HighWire-hosted journal article supplement (https://www.cmajopen.ca/highwire/filestream/89629/field_highwire_adjunct_files/0/open-2022-0013-1-at.pdf)
Supplement: open-2022-0013-1-at.pdf [file open-2022-0013-1-at.pdf]

## APPENDIX

Study Title: Patient-centred outcomes in geriatric trauma

### Semi-structured Interview Guide

- i. To the extent that you're comfortable, can you tell me about how you were injured?
- ii. What was it like for you to be taken to a trauma centre for care?
- iii. What was your sense of how serious your injuries were when you were admitted?
- iv. What were you told about what your injuries were? Who told you?
- v. If someone who had never been injured wanted to understand what it was like to be hospitalized with your injuries, how would you describe it to them?
- vi. How would you describe the quality of communication about your care with your hospital care team?
- vii. What stands out to you as being particularly noteworthy about communication with your care team? Can you elaborate with examples?
- viii. Sometimes when doctors and other members of the health care team talk to patients about what they want to achieve from their care, they describe this as their goals of care. What would you say were your goals of care at the time that you were hospitalized for your injuries? What conversations, if any, did you have with your care team about these goals of care?
- ix. Can you describe the care that you have received since being discharged from the trauma centre? How do you feel your recovery needs are being met?
- x. In Ontario, we have a program in place that is focused on improving the experience of seniors aged 65 and older in our health care system. It's called the senior-friendly care strategy. What aspects of your injury care stand out to you as being senior-friendly?
- xi. What do you think senior-friendly injury care should look like?
- xii. If you could tell the care teams one thing they should do to provide the best care to injured patients around your age, what would you tell them they should focus on?
